# Supplementary material
Source: PubMed Central journal article supplement (PMC3793840)
Supplement: NIHMS320764-supplement-Supplementary_figure_1.pdf [file NIHMS320764-supplement-Supplementary_figure_1.pdf]

Supplementary Figure 1

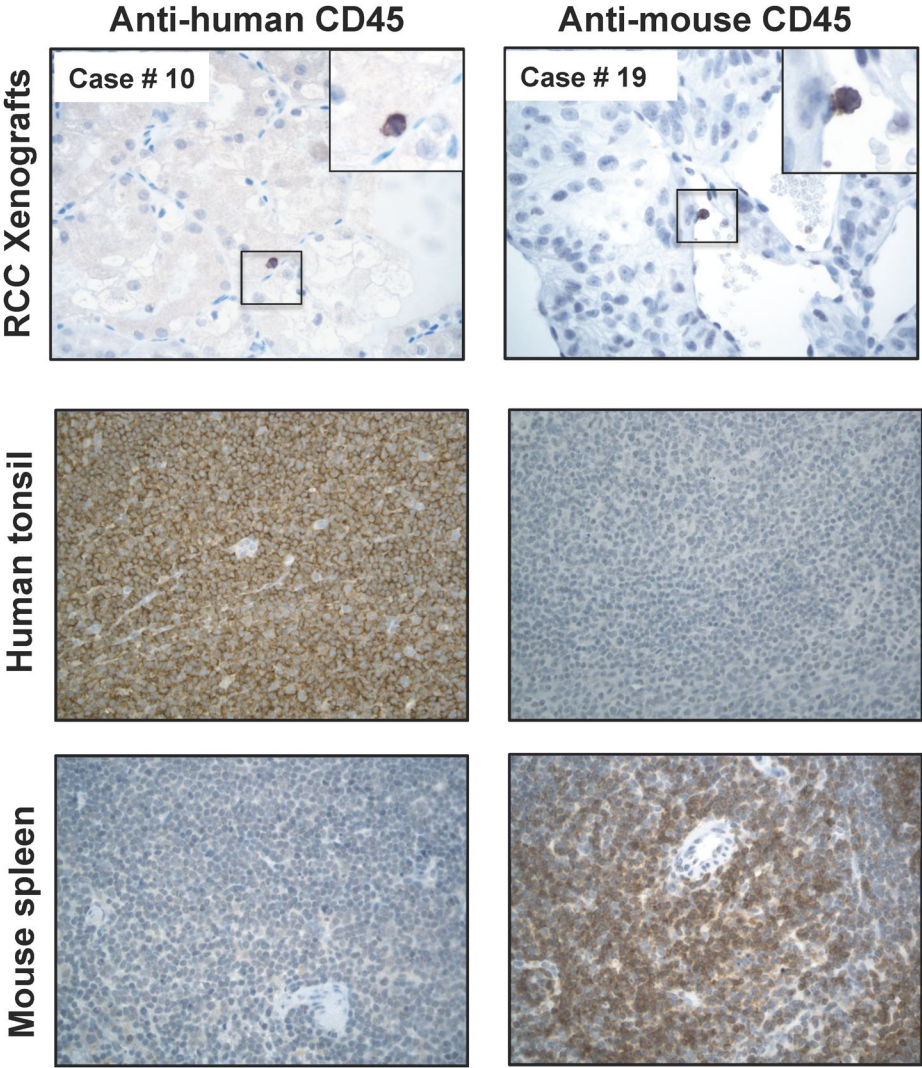

**Supplementary Figure 1.** Xenograft tissue sections were immunostained with an anti-human (left panels) or anti-mouse (right panels) CD45 antibody. Antibodies specificity was assessed using human tonsil and mouse spleen control tissues.
